# Supplementary material for: Measurement of carbon solubility in magnesium alloys using GD-OES
Source: Royal Society of Chemistry journal article supplement (doi:10.1039/c1ja10128e), 2011-01-01
Supplement: c1ja10128e.pdf [file c1ja10128e.pdf]

**Sample numbers, designations, and nominal compositions of the Mg-matrix (Table A1) and Fe-matrix (Table A2) calibration standards used in this work**

Table A1:

| No. | Designation   | Al      | B       | C       | Ca      | Co       | Cr       | Cu      | Fe     | Mn      | Mo      | N       | Ni       | P       | S       | Si      |
|-----|---------------|---------|---------|---------|---------|----------|----------|---------|--------|---------|---------|---------|----------|---------|---------|---------|
| 1   | 100Fe         | 0.01000 |         | 0.01000 |         |          | 0.03000  | 0.01000 | 99.719 | 0.10000 | 0.01000 |         | 0.03000  | 0.00500 | 0.00600 | 0.06000 |
| 2   | 1Al1Ni        | 1.47000 | 0.00900 | 0.12000 |         |          | 0.09000  | 0.15700 | 96.773 | 0.25700 |         | 0.00250 | 0.83700  | 0.04000 | 0.03800 | 0.16200 |
| 3   | 1B19Cr1Mn10Ni |         | 0.92360 | 0.01640 |         | 0.14750  | 18.61000 | 0.20280 | 67.408 | 1.47800 | 0.24730 | 0.01940 | 10.35000 | 0.02670 | 0.00140 | 0.56890 |
| 4   | 9Cr           |         |         | 0.06200 |         |          | 9.07000  | 0.08500 | 89.513 | 0.35000 |         |         | 0.10000  | 0.01800 | 0.02200 | 0.42000 |
| 5   | 1Mn           | 0.04360 |         | 0.11300 | 0.00210 |          | 0.01890  | 0.02190 | 98.112 | 1.35000 | 0.00300 |         | 0.01980  | 0.01890 | 0.00090 | 0.26280 |
| 6   | 12Cr          |         |         | 0.05000 |         | 0.01700  | 12.36000 | 0.03600 | 86.053 | 0.41000 | 0.11700 | 0.03300 | 0.23000  | 0.01800 | 0.01100 | 0.62000 |
| 7   | 5Al22Cr       | 5.33300 | 0.00020 | 0.01540 |         | 0.01870  | 22.32000 | 0.03820 | 71.497 | 0.26780 | 0.01860 |         | 0.17170  | 0.01520 | 0.00022 | 0.29850 |
| 8   | 17Co29Ni      | 0.07000 | 0.00100 | 0.00700 | 0.00050 | 17.00000 | 0.01200  | 0.02800 | 52.900 | 0.18000 | 0.01000 |         | 29.40000 | 0.00200 | 0.00070 | 0.17000 |
| 9   | 9Co5Mo18Ni    | 0.14000 | 0.00230 | 0.00400 |         | 9.22000  | 0.12000  | 0.22000 | 66.354 | 0.03100 | 4.82000 | 0.00200 | 18.40000 | 0.00400 | 0.00070 | 0.03200 |

Table A2:

| No. | Designation | Al      | Ca      | Ce      | Cu      | Fe    | Mg     | Mn      | Ni      | Si      | Zn      |
|-----|-------------|---------|---------|---------|---------|-------|--------|---------|---------|---------|---------|
| 10  | AXZ921      | 8.75000 | 1.87000 |         |         |       | 88.462 | 0.27100 |         |         | 0.64700 |
| 11  | AZ91D       | 8.22000 | 0.00560 | 0.00300 |         | 0.005 | 90.900 | 0.12000 |         | 0.01400 | 0.68000 |
| 12  | AZ91S       | 8.32000 | 0.00460 | 0.00000 |         | 0.002 | 90.750 | 0.24000 |         | 0.02500 | 0.60000 |
| 13  | AMS501      | 5.16000 |         |         | 0.01730 | 0.006 | 93.272 | 0.41000 | 0.00290 | 0.92000 | 0.21000 |

|    |       |         |         |         |         |       |        |         |         |         |         |
|----|-------|---------|---------|---------|---------|-------|--------|---------|---------|---------|---------|
| 14 | AM60B | 5.75000 | 0.00360 | 0.00000 |         | 0.003 | 93.910 | 0.25000 |         | 0.00740 | 0.01000 |
| 15 | AM50D | 4.80000 | 0.00550 | 0.00200 |         | 0.003 | 94.850 | 0.25000 |         | 0.01400 | 0.04200 |
| 16 | AM50S | 4.50000 | 0.00450 | 0.00100 |         | 0.004 | 94.930 | 0.32000 |         | 0.01800 | 0.18000 |
| 17 | AS21  | 2.35000 | 0.00600 | 0.00000 |         | 0.001 | 96.610 | 0.19000 |         | 0.74000 | 0.04400 |
| 18 | AZ51  | 4.45000 | 0.00370 | 0.00000 |         | 0.003 | 95.180 | 0.28000 |         | 0.01100 | 0.02100 |
| 19 | AZ31  | 2.85000 | 0.03400 | 0.00000 |         | 0.010 | 96.170 | 0.00320 |         | 0.00310 | 0.88000 |
| 20 | Ce3   | 0.00300 |         | 3.19000 | 0.08000 |       | 96.384 | 0.03300 | 0.00100 | 0.00200 |         |
